# Supplementary material for: Littoral cell angioma of a huge spleen with peripheral blood pancytopenia in a 14-year-old boy: a case report and review of the literature
Source: PubMed Central journal article supplement (PMC11560461; doi:10.3389/fped.2024.1473930), 2024-10-31
Supplement: Datasheet1.pdf [file Datasheet1.pdf]

**Supplementary Table 1 Preoperative conditions of the patient.**

| <b>Preoperative conditions</b>                           | <b>value</b>              |
|----------------------------------------------------------|---------------------------|
| <b>Age (year)</b>                                        | 14                        |
| <b>Sex</b>                                               | male                      |
| <b>Temperature (°C)</b>                                  | 36.3                      |
| <b>Pulse (bpm)</b>                                       | 100                       |
| <b>Respiration Rate</b>                                  | 20                        |
| <b>Blood pressure (mmHg)</b>                             | 100/71                    |
| <b>Infectious disease</b>                                | No                        |
| <b>Blood transfusion history</b>                         | No                        |
| <b>Previous illnesses</b>                                |                           |
| Growth delay                                             |                           |
| Moderate protein-energy malnutrition                     |                           |
| <b>Operation history</b>                                 | No                        |
| <b>Admission history</b>                                 | No                        |
| <b>Family medical history</b>                            | No                        |
| <b>Height and weight</b>                                 |                           |
| Height (cm)                                              | 148.0                     |
| Weight (kg)                                              | 35.0                      |
| <b>BMI (kg/m<sup>2</sup>)</b>                            | 15.98                     |
| <b>Blood cell test</b>                                   |                           |
| White blood cells (range 4.10-11.00× 10 <sup>9</sup> /L) | 2.27× 10 <sup>9</sup> /L  |
| Neutrophils (range 1.80-8.30× 10 <sup>9</sup> /L)        | 0.88× 10 <sup>9</sup> /L  |
| Lymphocytes (range 1.20-3.80× 10 <sup>9</sup> /L)        | 1.18× 10 <sup>9</sup> /L  |
| Monocytes (range 0.14-0.74× 10 <sup>9</sup> /L)          | 0.17× 10 <sup>9</sup> /L  |
| Eosinophils (range 0.00-0.68× 10 <sup>9</sup> /L)        | 0.03× 10 <sup>9</sup> /L  |
| Basophils (range 0.00-0.07× 10 <sup>9</sup> /L)          | 0.01× 10 <sup>9</sup> /L  |
| Red blood cells (range 4.50-5.90× 10 <sup>12</sup> /L)   | 3.93× 10 <sup>12</sup> /L |
| Platelets (range 150-407× 10 <sup>9</sup> /L)            | 40× 10 <sup>9</sup> /L    |

Hemoglobin (range 129-172 g/L) 109 g/L

**Tumor markers test**

Carcinoembryonic antigen (range 0.00-3.40 ng/mL) <0.30 ng/mL

Carbohydrate antigen 125 (range 0.00-35.00 u/mL) 9.26 u/mL

Carbohydrate antigen 199 (range 0.00-27.00 u/mL) 2.88 u/mL

Alpha-fetoprotein (range 0.00-7.00 ng/mL) 1.55 ng/mL

**Spleen size**

Computed tomography (length×width) 21.9 cm×9.1 cm

Abdominal ultrasonographic (length×width) 19.1 cm×8.5 cm

**Spleen Index**

83 cm<sup>2</sup>

**Tumor size**

Computed tomography (length×width) 9.3 cm×7.8 cm

Abdominal ultrasonographic (length×width) 7.4 cm×6.8 cm

---

**Supplementary Table 2 Intraoperative conditions of the patient.**

| <b>Intraoperative conditions</b>                                           | <b>value</b> |
|----------------------------------------------------------------------------|--------------|
| <b>The operation time (min)</b>                                            | 240          |
| <b>The intraoperative transfusion (ml)</b><br>Autologous blood transfusion | 300          |
| <b>The intraoperative blood loss (ml)</b>                                  | 50           |
| <b>The number of lymph nodes dissected</b><br>Splenic lymph nodes          | 8            |
| <b>Intraoperative complications</b>                                        | No           |

**Supplementary Table 3 Clinical data of children with LCA.**

| Cases            | Age (yr) | Sex    | Clinical presentation        | Anemia  | Decreased PLT | Pancytopenia | Imaging results                                                                                      | Tumor types | Biomarkers                                                     | Treatment and prognosis     |
|------------------|----------|--------|------------------------------|---------|---------------|--------------|------------------------------------------------------------------------------------------------------|-------------|----------------------------------------------------------------|-----------------------------|
| 1 <sup>[1]</sup> | 1        | Female | Splenomegaly, fever          | Yes     | Yes           | No           | MRI: high density                                                                                    | Multiple    | Factor VIII, CD31, CD34, CD68 <sup>+++</sup> +                 | Splenectomy, No recurrence  |
| 2 <sup>[2]</sup> | 2        | Male   | Splenomegaly                 | Yes     | Yes           | No           | CT: low-density shadows, MRI: mild progressive contrast enhancement, Ultrasound: low-density shadows | Multiple    | Unknown                                                        | Splenectomy                 |
| 3 <sup>[3]</sup> | 11       | Female | Abdominal symptoms           | No      | No            | No           | MRI: T1 hypointense signal, T2 hyperintense signal                                                   | Solitary    | CD31, CD68, CD34 <sup>+++</sup> , CD8 <sup>-</sup> , Ki67 (2%) | Splenectomy                 |
| 4 <sup>[4]</sup> | 12       | Male   | Splenomegaly                 | Unknown | Unknown       | Unknown      | Ultrasound: low-density                                                                              | Multiple    | Unknown                                                        | Splenectomy                 |
| 5 <sup>[5]</sup> | 15       | Male   | Abdominal symptoms           | No      | No            | No           | Enhanced CT: high density in early arterial phase, low density in portal venous phase                | Solitary    | Unknown                                                        | Splenectomy                 |
| 6 <sup>[6]</sup> | 26 days  | Male   | Vomiting, Abdominal symptoms | No      | Yes           | No           | CT: low echo MRI: T1 and T2 hypointense signal                                                       | Multiple    | ERG, CD68 and CD21, CD8 <sup>+++</sup> , CD34 <sup>-</sup> ,   | Conservative, No recurrence |
| 7 <sup>[7]</sup> | 2        | Male   | Purpura, Splenomegaly        | Yes     | No            | No           | Unknown                                                                                              | Unknown     | Unknown                                                        | Splenectomy, No recurrence  |

|                    |    |       |                                          |         |         |         |                                                                                                                                        |          |                                                                                         |                            |
|--------------------|----|-------|------------------------------------------|---------|---------|---------|----------------------------------------------------------------------------------------------------------------------------------------|----------|-----------------------------------------------------------------------------------------|----------------------------|
| 8 <sup>[8]</sup>   | 11 | Male  | Splenomegaly, Abdominal symptoms, Anemia | Yes     | Yes     | No      | Ultrasound: low echoes                                                                                                                 | Multiple | CD68, CD31, CD34 <sup>+++</sup>                                                         | Splenectomy                |
| 9 <sup>[9]</sup>   | 9  | Famel | Abdominal symptoms                       | Unknown | Unknown | Unknown | CT: mixed density of the spleen, central patchy high-density<br>Ultrasound: heterogeneous echoes                                       | Solitary | CD31, CD34 <sup>+</sup> , ERG, EMA, Vim <sup>++</sup> , Ki-67 <sup>+</sup>              | Splenectomy                |
| 10 <sup>[10]</sup> | 3  | Famel | Asymptomatic                             | Yes     | No      | No      | CT: low-density<br>Ultrasound: slightly stronger echoic                                                                                | Multiple | Vimentin/CD31, ERG, CD34, CD68, CD163, CD21 <sup>+++</sup> ,<br>++++, Ki67 <sup>+</sup> | Splenectomy, No recurrence |
| 11 <sup>[11]</sup> | 9  | Male  | Abdominal symptoms, Splenomegaly         | Unknown | Unknown | Unknown | MRI: T1 and T2 slightly prolonged/equal                                                                                                | Solitary | CD31, CD34 <sup>++</sup> , Ki-67, Vimentin, CD68 <sup>+++</sup>                         | Unknown                    |
| 12 <sup>[12]</sup> | 7  | Famel | Asymptomatic                             | No      | No      | No      | MRI: slightly long T1, isointense T2                                                                                                   | Solitary | CD31, CD34, Ki67 <sup>+++</sup>                                                         | Splenectomy, No recurrence |
| Our case           | 14 | Male  | Abdominal symptoms                       | Yes     | Yes     | Yes     | CT: low-density,<br>Enhanced CT: mixed density of the spleen, central patchy slightly high-density<br>Ultrasound: heterogeneous echoes | Multiple | CD31, CD34, CD68 <sup>+++</sup> ,<br>Ki67(1%), CD8 <sup>-</sup> ,                       | Splenectomy, No recurrence |

Note: CT: computed Tomography; MRI: magnetic resonance imaging;

- [1]Antón-Pacheo J, Ayuso RF, Cano I, et al. Splenic littoral cell angioma in an infant. *Journal of pediatric surgery*, 2000, 35(3): 508-509
- [2]Ertan G, Tekes A, Mitchell S, et al. Pediatric littoral cell angioma of the spleen: multimodality imaging including diffusion-weighted imaging. *Pediatric radiology*, 2009, 39: 1105-1109
- [3]Bedir R, Şehitoğlu İ, Calapoğlu AS, et al. A rare case of splenic littoral cell angioma in a child. *Journal of Laboratory Physicians*, 2014, 6(02): 117-120
- [4]Forest F, Duband S, Clemenson A, et al. Traumatic subcapsular splenic hematoma revealing littoral cell angioma and Gaucher's disease. *Annals of hematology*, 2010, 89: 1061-1062
- [5]Li Y, Wang X, Cai Y, et al. Laparoscopic central splenectomy for littoral cell angioma. *Journal of Gastrointestinal Surgery*, 2021, 25: 576-577
- [6]Gakenheimer-Smith L, Mohlman J, VandenHeuvel K, et al. A novel presentation of littoral cell angioma and lymphatic malformations in a neonate. *Pediatrics*, 2018, 141(Supplement\_5): S520-S525
- [7]Jasani M, Shah A and Shah A. Littoral cell angioma: A rare cause of pediatric thrombocytopenia. *Journal of Indian Association of Pediatric Surgeons*, 2018, 23(3): 156-157
- [8]Anbardar MH, Kumar PV and Forootan HR. Littoral cell angioma of the spleen: Cytological findings and review of the literature. *Journal of Cytology*, 2017, 34(2): 121-124
- [9]Wang C, Tian Y, Cai W, et al. Littoral Cell Angioma of Spleen Complicated With Hemorrhage—2019 Film Reading Window (9). *Anhui Yixue*, 2019, 40(9): 1076-1077
- [10]Mou Y, Yang L, Wang J, et al. Case report and literature review: Asymptomatic littoral cell angioma in a 3-year-old girl. *Frontiers in Pediatrics*, 2024, 12: 1383015
- [11]Lai B, Zhong Q, Peng J. Case 149 answer of diagnose please: rare single littoral cell angioma of spleen in children. *Radiol Pract.* (2021) 36(3):419–420
- [12]Wu R. Littoral Cell Angioma of the Spleen: Report of 10 Cases and Literature Review. Jinan: Shandong University; (2020).

**Supplementary Table 4 Postoperative recovery of the patient.**

| <b>Postoperative recovery</b>                            | <b>value</b>              |
|----------------------------------------------------------|---------------------------|
| <b>Postoperative early complications</b>                 |                           |
| Fever                                                    |                           |
| <b>Postoperative late complications</b>                  |                           |
|                                                          | No                        |
| <b>Time to soft diet (d)</b>                             | 1                         |
| <b>Hospital day after surgery (d)</b>                    | 8                         |
| <b>Pain score at postoperative day</b>                   | 2                         |
| <b>Blood cell test (after 1 month)</b>                   |                           |
| White blood cells (range 4.10-11.00× 10 <sup>9</sup> /L) | 7.14× 10 <sup>9</sup> /L  |
| Neutrophils (range 1.80-8.30× 10 <sup>9</sup> /L)        | 3.44× 10 <sup>9</sup> /L  |
| Lymphocytes (range 1.20-3.80× 10 <sup>9</sup> /L)        | 1.36× 10 <sup>9</sup> /L  |
| Monocytes (range 0.14-0.74× 10 <sup>9</sup> /L)          | 0.98× 10 <sup>9</sup> /L  |
| Eosinophils (range 0.00-0.68× 10 <sup>9</sup> /L)        | 1.19× 10 <sup>9</sup> /L  |
| Basophils (range 0.00-0.07× 10 <sup>9</sup> /L)          | 0.17× 10 <sup>9</sup> /L  |
| Red blood cells (range 4.50-5.90× 10 <sup>12</sup> /L)   | 5.13× 10 <sup>12</sup> /L |
| Platelets (range 150-407× 10 <sup>9</sup> /L)            | 545× 10 <sup>9</sup> /L   |
| Hemoglobin (range 129-172 g/L)                           | 138 g/L                   |
| <b>Blood cell test (after 3 months)</b>                  |                           |
| White blood cells (range 4.10-11.00× 10 <sup>9</sup> /L) | 11.1× 10 <sup>9</sup> /L  |
| Neutrophils (range 1.80-8.30× 10 <sup>9</sup> /L)        | 4.39× 10 <sup>9</sup> /L  |
| Lymphocytes (range 1.20-3.80× 10 <sup>9</sup> /L)        | 5.14× 10 <sup>9</sup> /L  |
| Monocytes (range 0.14-0.74× 10 <sup>9</sup> /L)          | 0.84× 10 <sup>9</sup> /L  |
| Eosinophils (range 0.00-0.68× 10 <sup>9</sup> /L)        | 0.66× 10 <sup>9</sup> /L  |
| Basophils (range 0.00-0.07× 10 <sup>9</sup> /L)          | 0.08× 10 <sup>9</sup> /L  |
| Red blood cells (range 4.50-5.90× 10 <sup>12</sup> /L)   | 5.20× 10 <sup>12</sup> /L |
| Platelets (range 150-407× 10 <sup>9</sup> /L)            | 185× 10 <sup>9</sup> /L   |
| Hemoglobin (range 129-172 g/L)                           | 139 g/L                   |
| <b>Weight (kg)</b>                                       |                           |
| After 1 month                                            | 34.3                      |
| After 3 months                                           | 38.2                      |
| After 8 months                                           | 41.6                      |
| <b>Height (cm)</b>                                       |                           |
| After 1 month                                            | 148.0                     |
| After 3 months                                           | 149.2                     |

|                |       |
|----------------|-------|
| After 8 months | 151.4 |
|----------------|-------|

**BMI (kg/m<sup>2</sup>)**

|               |       |
|---------------|-------|
| After 1 month | 15.66 |
|---------------|-------|

|                |       |
|----------------|-------|
| After 3 months | 17.16 |
|----------------|-------|

|                |       |
|----------------|-------|
| After 8 months | 18.15 |
|----------------|-------|

---



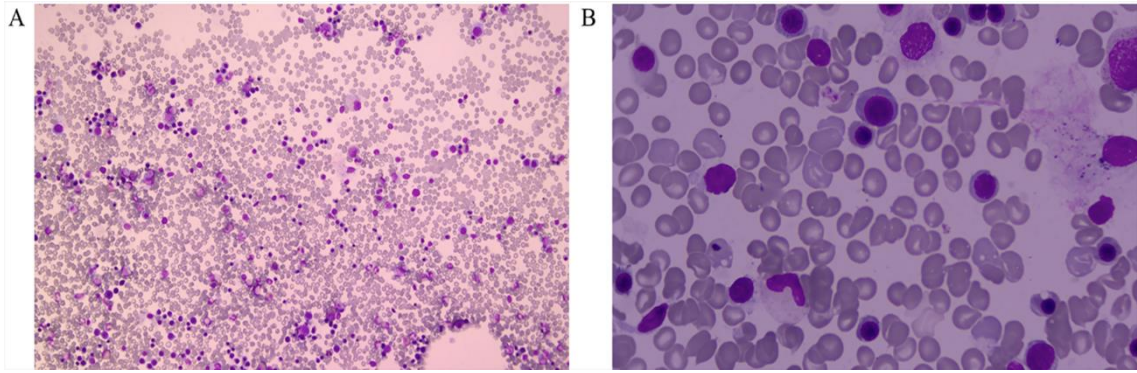

Supplementary Figure 1 Blood system check (A) The blood smear from the peripheral blood showed that blood cell morphology was normal. (HE  $\times 100$ ). (B) The blood smear from the bone marrow aspiration showed that megakaryocytic series and erythrocytic series increased but granulocytic series decreased. (HE  $\times 100$ ).

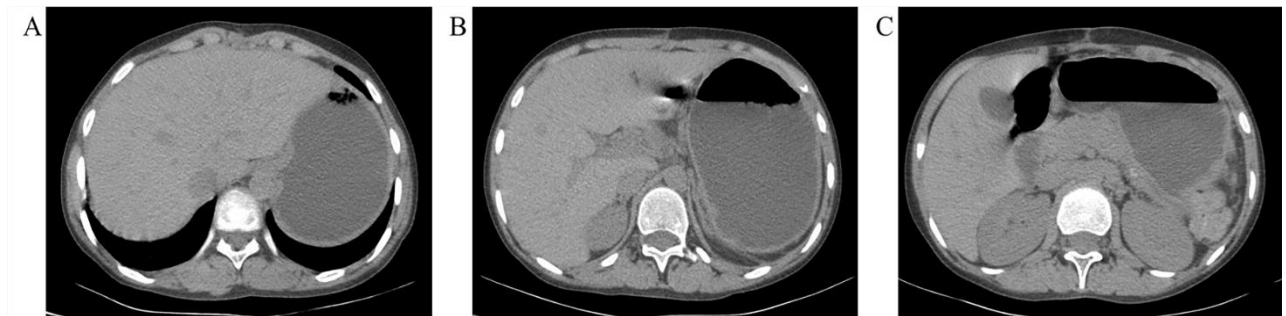

Supplementary Figure 2 Postoperative CT (A,B,C) shown that no abnormal lesions were found in the surgical area.
